# Supplementary material for: Vorbereitung auf eine differenzierte Hämotherapie nach Trauma – Ergebnisse einer Befragung deutscher Kliniken
Source: Springer Nature journal article supplement (doi:10.1007/s10049-021-00912-x), 2021-07-05
Supplement: MOESM1 [file 19332568]

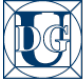

**\* 1. Wie lautet die Zertifizierung Ihrer Klinik innerhalb Ihres TraumaNetzwerk DGU®? Sollte Ihre Klinik keinem TraumaNetzwerk DGU® angehören, nehmen Sie bitte eine vergleichbare Einschätzung vor.**

- Lokales TraumaZentrum
- Regionales TraumaZentrum
- Überregionales TraumaZentrum

**\* 2. Nutzen Sie Point of Care (PoC)-Diagnostik im Schockraum?**

- Ja
- Nein

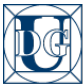

**\* 3. Welche PoC-Diagnostik nutzen Sie im Schockraum?**

- Blutgasanalyse (BGA)
- ROTEM
- Multiplate

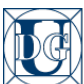

**\* 4. Nutzen Sie PoC-Diagnostik auf der Intensivstation?**

- Ja
- Nein

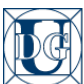

**\* 5. Welche PoC-Diagnostik nutzen Sie auf der Intensivstation?**

- Blutgasanalyse (BGA)
- ROTEM
- Multiplate



DEUTSCHE  
GESELLSCHAFT FÜR  
UNFALLCHIRURGIE

Versorgungsrealität in Deutschland bezüglich  
Massivtransfusionsprotokoll (MTP) nach Trauma

**\* 6. Existiert ein definiertes Massivtransfusionsprotokoll (MTP) in Ihrer Klinik?**

- Ja
- Nein

**\* 7. Welche Definition von Massivtransfusion benutzen Sie?**

- 10 EK/ 24h
- 10 Blutkomponenten/ 24h
- > 3 EK/ h
- > 3 Blutkomponenten/ h
- Andere

**\* 8. Welche Aktivierungskriterien nutzen Sie für das MTP?**

- Anforderung aus Präklinik
- ABC-Score
- TASH-Score
- Schreiber-Score
- Vandromme-Score
- Larsen-Score
- PWH-Score

**\* 9. Wie gewichten Sie folgende Parameter im Rahmen der Transfusionsentscheidung?**

|                                   | wenig                 | eher weniger          | mittel                | eher stark            | stark                 |
|-----------------------------------|-----------------------|-----------------------|-----------------------|-----------------------|-----------------------|
| Schockindex > 1                   | <input type="radio"/> |
| Pulsdruck < 45 mmHg               | <input type="radio"/> |
| Laktat > 5 mg/dl                  | <input type="radio"/> |
| Positives FAST                    | <input type="radio"/> |
| Antikoagulantien in Vormedikation | <input type="radio"/> |

**\* 10. Wer/was entscheidet über die Verwendung/den Einsatz von MTP?**

- nach Maßgabe behandelnder Anästhesist
- nach Maßgabe behandelnder Chirurg
- nach Maßgabe Traumaleader
- nach Verletzungsmuster
- andere Gründe:

**\* 11. Wie oft wurde in Ihrer Klinik in den letzten 12 Monaten das MTP aktiviert? (Bitte nur eine Zahl eintragen.)**

**\* 12. Wo erfolgte die Massivtransfusion?**

- Schockraum
- OP
- Intensivstation (ICU)

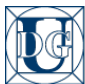

DEUTSCHE  
GESELLSCHAFT FÜR  
UNFALLCHIRURGIE

Versorgungsrealität in Deutschland bezüglich  
Massivtransfusionsprotokoll (MTP) nach Trauma

**\* 13. Was war ursächlich für die Hämorrhagien?**

- Direkte Traumafolge
- Intra-/ perioperative Komplikation (auch nicht traumaassoz. OPs)
- Internistische Ursache (z.B. Antikoagulation, GI-Blutung)
- Sonstige:

**\* 14. Welche Blutprodukte sind ad hoc verfügbar?**

- |                                                 |                                              |
|-------------------------------------------------|----------------------------------------------|
| <input type="checkbox"/> EK                     | <input type="checkbox"/> TK                  |
| <input type="checkbox"/> FFP                    | <input type="checkbox"/> Fibrinogen          |
| <input type="checkbox"/> Lyophilisiertes Plasma | <input type="checkbox"/> Faktorenkonzentrate |

**\* 15. Wie lange dauert es durchschnittlich bis Sie ad hoc nicht verfügbare Blutprodukte, die Sie von extern anfordern müssen, geliefert bekommen?**

- < 30 Minuten
- 30-60 Minuten
- > 60 Minuten

**\* 16. Gibt es in Ihrer Klinik ein starres Transfusionsschema bezogen auf die Komponenten im Rahmen der Notfalltransfusion im hämorrhagischen Schock?**

- Nein
- 1:1:1 (EK:FFP:TK)
- 4:4:1 (EK:FFP:TK\*) \*gepoolte TK
- 2:1:0 (EK:FFP:TK)
- Anderes (EK:FFP:TK):

**\* 17. Welche adjuvanten Medikamente nutzen Sie regelhaft bei massiver Hämorrhagie?**

- TXA
- Calcium
- Fibrinogen
- Faktorenkonzentrate
- Desmopressin (DDAVP)
- Sonstige:

**\* 18. Haben Sie Erfahrungen mit der Transfusion von Vollblutpräparaten im hämorrhagischen Schock?**

- Ja
- Nein

**\* 19. Ist Ihnen der Begriff „Low-Titer-Blutgruppe-O-Vollblut“ (LTOWB) bekannt?**

- Ja
- Nein

**\* 20. Erachten Sie die Wiederezulassung von Vollblut als Therapeutikum bei akuten Blutungen für sinnvoll?**

- Ja
- Nein
